# Supplementary material for: Standardised protocol for a prospective cross-sectional multicentre clinic-based evaluation of two dual point-of-care tests for the screening of HIV and syphilis in men who have sex with men, sex workers and pregnant women
Source: PubMed Central journal article supplement — BMJ Open. 2020 Nov 26;10(11):e044479. doi: 10.1136/bmjopen-2020-044479 (PMC7692839; doi:10.1136/bmjopen-2020-044479), 2020-11-26
Supplement: bmjopen-2020-044479.draft_revisions.pdf [file bmjopen-2020-044479.draft_revisions.pdf]

# BMJ Open

BMJ Open is committed to open peer review. As part of this commitment we make the peer review history of every article we publish publicly available.

When an article is published we post the peer reviewers' comments and the authors' responses online. We also post the versions of the paper that were used during peer review. These are the versions that the peer review comments apply to.

The versions of the paper that follow are the versions that were submitted during the peer review process. They are not the versions of record or the final published versions. They should not be cited or distributed as the published version of this manuscript.

BMJ Open is an open access journal and the full, final, typeset and author-corrected version of record of the manuscript is available on our site with no access controls, subscription charges or pay-per-view fees (<http://bmjopen.bmj.com>).

If you have any questions on BMJ Open's open peer review process please email [info.bmjopen@bmj.com](mailto:info.bmjopen@bmj.com)

# BMJ Open

**A standardised protocol for a prospective multi-centre clinic-based evaluation of two dual point-of-care tests for the screening of HIV and syphilis in men who have sex with men, sex workers, and pregnant women**

|                               |                                                                                            |
|-------------------------------|--------------------------------------------------------------------------------------------|
| Journal:                      | <i>BMJ Open</i>                                                                            |
| Manuscript ID                 | bmjopen-2020-044479                                                                        |
| Article Type:                 | Protocol                                                                                   |
| Date Submitted by the Author: | 03-Sep-2020                                                                                |
| Complete List of Authors:     | Sherriff, Nigel; Brighton Uni, School of Health Sciences                                   |
| Keywords:                     | HIV & AIDS < INFECTIOUS DISEASES, Public health < INFECTIOUS DISEASES, INFECTIOUS DISEASES |
|                               |                                                                                            |

SCHOLARONE™  
Manuscripts

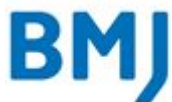

I, the Submitting Author has the right to grant and does grant on behalf of all authors of the Work (as defined in the below author licence), an exclusive licence and/or a non-exclusive licence for contributions from authors who are: i) UK Crown employees; ii) where BMJ has agreed a CC-BY licence shall apply, and/or iii) in accordance with the terms applicable for US Federal Government officers or employees acting as part of their official duties; on a worldwide, perpetual, irrevocable, royalty-free basis to BMJ Publishing Group Ltd ("BMJ") its licensees and where the relevant Journal is co-owned by BMJ to the co-owners of the Journal, to publish the Work in this journal and any other BMJ products and to exploit all rights, as set out in our [licence](#).

The Submitting Author accepts and understands that any supply made under these terms is made by BMJ to the Submitting Author unless you are acting as an employee on behalf of your employer or a postgraduate student of an affiliated institution which is paying any applicable article publishing charge ("APC") for Open Access articles. Where the Submitting Author wishes to make the Work available on an Open Access basis (and intends to pay the relevant APC), the terms of reuse of such Open Access shall be governed by a Creative Commons licence – details of these licences and which [Creative Commons](#) licence will apply to this Work are set out in our licence referred to above.

Other than as permitted in any relevant BMJ Author's Self Archiving Policies, I confirm this Work has not been accepted for publication elsewhere, is not being considered for publication elsewhere and does not duplicate material already published. I confirm all authors consent to publication of this Work and authorise the granting of this licence.

1 **A standardised protocol for a prospective multi-centre clinic-based evaluation of two dual point-of-care**  
2 **tests for the screening of HIV and syphilis in men who have sex with men, sex workers, and pregnant**  
3 **women**  
4

5 **Group Author: ProSPeRo Network\*** (Project on Sexually Transmitted Infection Point-of-care Testing  
6 established by the Sexual and Reproductive Health and Research Department of WHO):  
7

8  
9 **Correspondence to:** Professor Nigel Sherriff, School of Health Sciences, University of Brighton, Westlaine  
10 House, Room 364, Village way, Falmer, BN1 9PH, United Kingdom. Email: [n.s.sherriff@brighton.ac.uk](mailto:n.s.sherriff@brighton.ac.uk); Tel:  
11 +44(0)1273 644539  
12

13  
14 **Word Count:** 3983  
15  
16  
17  
18  
19  
20  
21  
22  
23  
24  
25  
26  
27  
28  
29  
30  
31  
32  
33  
34  
35  
36  
37  
38  
39  
40  
41  
42  
43  
44  
45  
46  
47  
48  
49  
50  
51  
52  
53  
54  
55  
56  
57  
58  
59  
60

For peer review only

**ABSTRACT**

**Introduction:** Dual point-of-care tests (POCTs) for detecting antibodies to HIV and syphilis have been developed for use with venous whole blood, serum/plasma, or finger-prick capillary whole blood. Several tests are commercially available showing encouraging performance compared to ‘gold-standard’ reference tests in laboratory-based studies. However, data on their performance in the field is limited. This study will conduct a clinic-based evaluation to assess the performance characteristics and acceptability to end-users of two dual HIV/syphilis POCTs for the screening of HIV and syphilis amongst men who have sex with men (MSM), sex workers (SW), and pregnant women (PW). This master protocol outlines the overall research approach that will be used in seven countries.

**Method and analyses:** MSM, SW, and PW presenting at clinic evaluation sites in high, low- and middle-income countries (LMICs) will be enrolled. The two (WHO pre-approved) POCTs to be evaluated are SD Bioline HIV/Syphilis Duo (Abbott) and DPP HIV-Syphilis Assay (Chembio). Finger prick blood will be collected to perform POCTs and compared with laboratory results (venepuncture blood). Procedures will be carried out by trained healthcare staff and tests performed according to the manufacturers’ directions. Sample size was calculated based on local prevalence of HIV and syphilis. The sensitivity, specificity, positive and negative predictive values for each POCT will be calculated. The study is ongoing with recruitment expected to be completed in all countries by mid to late 2021.

**Ethics and dissemination:** This core protocol was independently peer reviewed and approved by the Research Project Review Panel (RP2) of the WHO Department of Sexual and Reproductive Health and Research (SRH) and by the WHO Ethics Review Committee (ERC). The protocol has been adapted to individual countries and approved by RP2, ERC, and institutional review boards at each site. Results will be disseminated through peer-reviewed journals and relevant conferences.

**Key words:** HIV; Syphilis; Public Health; Point-of-Care-Tests; Men who have Sex with Men; Pregnant Women; Sex Workers; Evaluation.

## Article Summary

### Strengths and limitations of this study

- To our knowledge, the study is the first independent multi-centre and multi-country clinic-based evaluation of dual HIV/syphilis POCTs for the screening of men who have sex with men, sex workers, and pregnant women.
- The clinic-based evaluation protocol design more accurately reflects real-world conditions and therefore has greater potential to demonstrate the dual POCTs' practical value as a screening tool, compared to laboratory-based evaluations.
- Although dual HIV/syphilis POCTs can be convenient for patients, treponemal antibodies persist following successful treatment of syphilis. Therefore, additional treponemal and non-treponemal tests may still be required for correctly identifying active infections.
- The public health significance of this study is based on the premise that it will evaluate the performance characteristics of two dual POCTs in field settings, as well as enable assessment of operational characteristics by healthcare workers and acceptability to patients.
- The study will identify opportunities to support the WHO Global Health Sector Strategy on Sexually Transmitted Infections, 2016–21.

## INTRODUCTION

Serological tests are the diagnostic tests of choice for both syphilis and HIV. For syphilis, two serological tests (treponemal and non-treponemal) are used for laboratory diagnosis. Traditionally, a non-treponemal assay is used for screening and a specific treponemal assay is then used for confirmation. However, with increasing automation and decreasing cost, some institutions use the 'reverse' algorithm whereby initial screening is performed with automated treponemal enzyme linked or chemiluminescence immunoassays. If reactive, it is followed by a second manual non-treponemal test such as the Rapid Plasma Reagin (RPR) assay to assess disease activity.[1]

With respect to HIV diagnosis, two different rapid lateral flow immunochromatographic assays or automated enzyme immunoassays (EIAs) are used in tandem for screening and confirmation. In some settings, a Western blot (WB) assay is performed for the confirmation of a positive result. However, some of these tests are technically demanding and require laboratory equipment that is not always widely available in resource-limited settings. Therefore in recent years, there has been considerable effort to develop new diagnostic tools including point-of-care tests (POCTs) which can be used outside of a typical clinical laboratory (e.g. a physician's office, hospital bedside, patient's home, in the field/community based), by non-laboratory trained healthcare providers.[2] Over the last decade, many POCTs for sexually transmitted infections (STIs) have been developed and are commercially available.[3] Guidance or recommendations regarding the placement of these new tests in the diagnostic pathway for STIs is limited, however interim recommendations on the use of POCTs among pregnant women are available.[4] Furthermore, although validated and licensed rapid HIV assays are commercially available and widely used in the field, they are stand-alone and do not offer the function of dual screening. As a result, syphilis testing coverage may be suboptimal relative to HIV. Integrated testing services will improve testing coverage.[5, 6] The WHO Global Health Sector Strategy on STIs acknowledged the lack of reliable, low-cost POCTs as a major barrier to advancing STI control and prevention.[7]

As HIV and syphilis can be asymptomatic, sensitive diagnostic testing is crucial for early detection and diagnosis, and for the guidance of treatment and prevention of onward transmission.[8] Dual tests that can be used at the point-of-care for simultaneously detecting antibodies to HIV and syphilis (dual HIV/syphilis POCTs)

1 have been developed for use with finger prick capillary whole blood. To date, they have shown encouraging  
2 performance compared to 'gold-standard' diagnostic reference tests in laboratory-based studies; but there is  
3 limited data on their performance in the field.[9, 10] Field studies in real-world settings are important because  
4 the performance of POCTs, including positive predictive values and negative predictive values, can be  
5 influenced by epidemiological and environmental factors. Both operational characteristics of the test and human  
6 factors, such as the ability to follow properly the POCT procedures (e.g. taking whole blood finger prick  
7 specimens, correct timing of adding the buffer and reading the result, and interpreting results accurately), can  
8 interfere with the performance of a POCT.[11] Evaluation of the performance of these dual tests in clinic-based  
9 settings and their acceptability to patients and healthcare providers is therefore a high priority. The need for  
10 standardised high quality evaluations of POCTs was identified by two technical consultations as crucial for the  
11 development and global uptake of POCTs for STIs.[7]

12  
13  
14  
15  
16  
17  
18  
19  
20  
21  
22  
23  
24  
25  
26 Consequently, the SRH Department of WHO has established the global ProSPeRo study (global Project on STI  
27 POCT). The overall objectives are to: i) advise WHO Member States and other public health institutions on the  
28 performance characteristics of commercially available STI diagnostic tests that can be used at the point-of-care;  
29 ii) assess the feasibility, acceptability of POCTs by both health care providers and clients/patients; and iii)  
30 support further implementation and roll-out of STI POCTs within national STI programmes by the provision of  
31 technical assistance tools.

32  
33  
34  
35  
36  
37  
38  
39  
40  
41 ProSPeRo comprises three core components: i) a laboratory-based arm assessing the performance characteristics  
42 of STI POCTs that have not yet been evaluated independently in the laboratory;[12] ii) a clinical-based  
43 component to evaluate STIs POCT performance in the field compared with that of gold-standard laboratory tests  
44 among several STI high-risk and vulnerable populations worldwide, and; iii) a clinical-utility component  
45 assessing the feasibility and acceptability of STI POCTs among men who have sex with men (MSM) in non-  
46 clinical settings in four countries within the WHO European region.

47  
48  
49  
50  
51  
52  
53  
54  
55 This master protocol refers to the second component of ProSPeRo, a clinic-based evaluation of dual POCTs for  
56 the screening of HIV and syphilis in MSM, sex workers (SW) and pregnant women (PW). These groups were  
57 identified as those most in need of increased access to testing based on a series of consultations led by WHO,  
58  
59  
60



1 which considered definitions of key and vulnerable populations [13] and the epidemic trends of HIV/STIs  
2 amongst them.[14, 15] Furthermore, elimination of mother-to-child-transmission of syphilis and HIV is  
3 considered to be one of the most cost-effective public health interventions, and WHO guidance for country-level  
4 action includes targets for the screening and treatment of PW.[16]  
5  
6  
7  
8  
9

10  
11 A clinic-based evaluation is used to determine test performance when the test is performed by clinic personnel  
12 who are not trained laboratory technicians. This paper outlines the master protocol within ProSPeRo, describing  
13 the overall research approach that will be used for a clinic-based evaluation of dual POCTs for the screening of  
14 HIV and syphilis in MSM, SW, and PW. The protocol was developed using the QUADAS-2 framework, a  
15 quality assessment tool for primary diagnostic accuracy studies.[17] The protocol will be adapted accordingly  
16 for individual countries taking part.  
17  
18  
19  
20  
21  
22  
23  
24  
25

## 26 **Objectives**

27  
28 The primary objectives of this clinic-based evaluation are to assess: i) the performance of two dual POCTs for  
29 the screening of HIV and syphilis in MSM, SW, and PW using finger prick capillary whole blood compared to  
30 reference laboratory-based serum tests for HIV and syphilis (HIV 1/2 EIA and the treponemal reference test),  
31 and; ii) the minimal operational characteristics and acceptability of these dual HIV-syphilis POCTs to both  
32 patients and healthcare providers. A secondary objective is to explore the performance and the potential utility  
33 of these dual HIV-syphilis POCTs in identifying active syphilis using a combination of non-treponemal and  
34 treponemal tests as a comparator.  
35  
36  
37  
38  
39  
40  
41  
42  
43  
44

## 45 **METHODS AND ANALYSIS**

### 46 47 48 49 **Study Setting and Design**

50  
51 This clinic-based evaluation is a multi-site, observational, cross-sectional study of MSM, SW, and PW  
52 presenting at sexual health and antenatal clinics for HIV/STI screening according to national guidelines. The  
53 study will be implemented across multiple countries and in some countries, at multiple sites, on the basis of  
54 locally adapted protocols. For the purposes of this protocol, the term study site or evaluation site refers to an  
55 individual clinic (sexual health or antenatal).  
56  
57  
58  
59  
60

1  
2  
3 This paper is the master protocol and outlines the overall research approach which will be adapted accordingly  
4 for individual countries. Seven international sites have been approved by WHO in consultation with in-country  
5 researchers and providers as well as local authorities and WHO Country Offices (Italy, UK, Malta, Peru,  
6  
7 Uganda, Morocco, South Africa). A standardised site-assessment is implemented as part of the approval process  
8  
9 for sites expressing an interest to participate. Site-specific protocols are developed with WHO and the in-  
10  
11 country principle investigator to agree and delineate the range of parameters and the minor changes needed to  
12  
13 adapt the study to the local context whilst complying with this master protocol. The study is ongoing with  
14  
15 recruitment expected to be completed in all countries by mid to late 2021.  
16  
17  
18  
19  
20  
21

## 22 **Study Participants**

### 23 *Inclusion criteria*

24  
25 The target populations are MSM, SW, and PW. The term MSM is used to describe those males who have sex  
26 with other males, regardless of whether or not they have sex with women or have a personal or social identity  
27 associated with that behaviour, such as being 'gay' or 'bisexual'. Sex work is the provision of sexual services  
28 for money or goods. SW are women/men who receive money or goods in exchange for sexual services, and who  
29 consciously define those activities as income-generating even if they do not consider sex work as their  
30 occupation. Antibiotic usage in participants who have been prescribed treatment for syphilis or other infections  
31 three weeks prior to study entry will be recorded in the data collection form but not used as a criterion for  
32 exclusion. All participants have to be at least 18 years old to participate.  
33  
34  
35  
36  
37  
38  
39  
40  
41  
42  
43  
44

45 Healthcare staff who administer the POCTs will also be asked to complete a short questionnaire to evaluate the  
46 operational characteristics (Table 1). In order to be eligible to complete this they need to have been trained in  
47 and administered the POCTs and give consent to complete the questionnaire.  
48  
49  
50  
51  
52

### 53 *Exclusion criteria*

54  
55 MSM, SW, PW, and healthcare staff who refuse to give consent, are younger than 18 years, and/or have  
56 previously participated in the study.  
57  
58  
59  
60

## Description of the POCTs under evaluation

The tests to be evaluated are SD Bioline HIV/Syphilis Duo (Abbott Diagnostics, United States; hereafter termed Bioline POCT) and Chembio Dual Path Platform (DPP) HIV–Syphilis Assay (Chembio, United States; hereafter termed Chembio POCT). Both are single-use qualitative immunochromatographic assays for the simultaneous detection of HIV and syphilis (treponemal component) in human serum, plasma, whole venous or fingerpicked blood. The Bioline POCT (Figure 1) detects antibodies of all isotypes (IgG, IgM, IgA) against HIV specific antigens (HIV-1 gp41, sub O, HIV-2 gp36) and specific IgG and IgM antibodies against a 17 kilodalton recombinant *Treponema pallidum* antigen (*rTp17* kDa). In 2015 this test was accepted for the WHO list of prequalified in vitro diagnostics.[18] The Chembio POCT detects specific antibodies against HIV types 1 and 2 (HIV 1/2) and *Treponema pallidum* (Figure 2). Recently, the Chembio company developed the DPP Micro Reader (MR) to complete the Chembio DPP technology and minimise error due to subjective visual interpretation (Figure 3). The MR is a portable battery-powered cubic reflectance reader with a liquid crystal display. The display shows the status of the instrument and test result to the operator, and a multi-function button on top turns on the MR and guides the operator. The device is fitted to the Chembio POCT via a dedicated holder. The MR scans the Chembio POCT cartridge, verifies the presence of line(s) at the control and each of the test line positions and measures numerically the optical density of each test line(s). The device interprets the results comparing the optical density with that of a scoring algorithm, translating it into a numerical value. This number is compared with that of the set cut-off ( $> 20$  for the HIV component,  $> 10$  for the treponemal component) and if higher, the POCT result is displayed as reactive (R), otherwise, as non-reactive (NR). If the MR reading phase is not successful, the displayed result is invalid (I).

FIGURES 1, 2, AND 3 ABOUT HERE

**Table 1.** Acceptability questions and operational characteristics

| <b>Healthcare staff – operational characteristics</b> |                                                                                                                                      |
|-------------------------------------------------------|--------------------------------------------------------------------------------------------------------------------------------------|
| 1.                                                    | Clarity of kit instructions ( <i>difficult to follow, fairly clear, very clear, excellent</i> )                                      |
| 2.                                                    | Ease of use ( <i>complicated, fairly easy, very easy, excellent</i> )                                                                |
| 3.                                                    | Ease of interpretation of results ( <i>difficult, fairly easy, very easy, unambiguous</i> )                                          |
| 4.                                                    | Rapidity of test results ( <i>&lt;20 mins, 20-30 mins, &gt;30 mins</i> )                                                             |
| 5.                                                    | Hands on time ( <i>&lt;5 mins, 5 mins, 10 mins, &gt;10 mins</i> )                                                                    |
| 6.                                                    | Training time required ( <i>&lt;30 mins, 30 mins, 1 hour, &gt;1 hour</i> )                                                           |
| 7.                                                    | Number of tests needed to be performed before being able to feel comfortable with POCT                                               |
| 8.                                                    | Overall comment/recommendation ( <i>free text response</i> )                                                                         |
| <b>Patient – acceptability questions</b>              |                                                                                                                                      |
| 1.                                                    | Would you be willing to wait for the results at the clinic, directly after the tests are performed? ( <i>yes, no, don't know</i> )   |
| 2.                                                    | If yes, how long would you be willing to wait? ( <i>up to 20 min, up to 30 min, up to 1 hour, up to 2 hours, don't know, other</i> ) |
| 2.1.                                                  | If other, please describe                                                                                                            |
| 3.                                                    | Would you prefer two single tests or one dual test? ( <i>single, dual, it's the same, don't know/don't care</i> )                    |
| 3.1.                                                  | If you prefer a single test, why? ( <i>don't want to be tested for HIV, don't want to be tested for syphilis, other</i> )            |
| 3.1.1.                                                | If other, please describe                                                                                                            |

### Reference laboratory tests

For this master protocol, Bioline and Chembio POCTs HIV/syphilis results will be compared with those of the reference or 'gold-standard' tests for this evaluation; respectively these are laboratory-based HIV 1/2 EIA confirmed by immunoblot (antibody only), and for syphilis the reference test is the TPPA. All reference tests will be performed in accordance with the manufacturer's directions and laboratory staff will be blinded to the POCT results. For the determination of potential utility, a probable active syphilis case is defined as non-Tp (such as RPR test positive at a titre >8), confirmed by TPPA.

### Acceptability of dual POCTs

The acceptability of the dual POCTs to patients will be determined as part of the evaluation using a structured questionnaire. Moreover, at the end of enrolment, operational characteristics will be evaluated by healthcare staff who administer the POCTs via a brief self-completion provider questionnaire. These acceptability questions and operational characteristics are displayed in Table 1.

## Study procedure

### *Recruitment, enrolment, and consent*

For each site, patients will be recruited over nine months (maximum) or until the required sample size is reached. Consecutive MSM, SW, and PW presenting to the clinic for HIV/STI screening at the evaluation sites will be informed about the study by a healthcare provider (HCP 1; see Figure 4 patient flowchart). If they are interested in participating (pre-consent), a second HCP (HCP 2) will evaluate the inclusion criteria and provide a participant information sheet (PIS) and informed consent form (ICF). If the potential participant fits the criteria and agrees to participate, HCP 2 will take final written informed consent and HCP 3 will perform the routine care (below) and the additional tests along with completion of the associated case report forms (CRFs).

### *Specimen collection*

The HCP will undertake a routine examination of the patient according to local clinical procedures. Participants will be asked to complete an acceptability questionnaire. 3-5 ml of venous blood will be collected for reference testing and placed into labelled collection tubes (with anticoagulant that does not interfere with the assays), and then transported to the laboratory in accordance with standard operating procedures at the local site. The venous blood sample will be processed for reference testing within 12 hours of collection or centrifuged and stored at 2-8°C for 5 days maximum.

A capillary whole blood sample will be collected using finger prick blood to perform both POCTs according to the manufacturers' instructions, collecting the required amount of capillary blood using the equipment provided in both test kits and waiting a determined time (measured with a timer for each test) before reading the results. With the finger only being pricked once, the first blood drop will be used for the Bioline test and the second drop for the Chembio test. A double reader method (Reader 1-Reader 2 [R1-R2]) will be adopted for both tests to determine any variability in the interpretation of test results.[11] The MR (Chembio) will be read by R2 only. R1 and R2 will be blind to each other's results and to the clinical history of the patients.

## FIGURE 4 ABOUT HERE

*Follow-up procedure*

Pre- and post-test counselling will be provided to all participants according to WHO recommendations and local clinical practice. Participants will not be informed of their POCT results and the results will not be used for follow-up because the POCTs are being evaluated in the context of already established clinical testing procedures. Patients with a positive reference test result will be treated according to the standards of care described in national guidelines for each evaluation site.

**Outcomes**

*Primary outcome:* The primary outcome is a measure of the performance of two dual POCTs for the screening of HIV and syphilis. Each test component will be considered separately and compared to the respective gold standard. Readings of the first rater (R1) will be considered as the outcome variable for the comparison. *Secondary outcomes:* Two secondary outcomes are as follows: i) the acceptability of the two dual HIV/syphilis POCTs to patients and healthcare providers; ii) the potential utility of two dual HIV/syphilis POCTs in identifying active syphilis using a combination of non-treponemal and treponemal tests.

**Sample size**

The formula used for the sample size calculation is based on the 2006 WHO/TDR expert panel document on the evaluation of new diagnostic methods and techniques.[19] As per the standard approach, the sample size is adjusted for the infection prevalence using the formula  $(100/\text{prevalence} \times \text{sample size using sensitivity/specificity only})$ . For example, if it is estimated that the sensitivity of a new test is 80% compared to the reference standard, then 200 infected study subjects by the reference standard test would need to be recruited for a confidence interval of + 5% around the point estimates of sensitivity and specificity. If the prevalence of infection in the study population is 10%, then there will be 10 infected subjects per 100 healthcare users seen at the clinic. Then 2,000  $(100/10 \times 200)$  participants will need to be recruited.

## Project and data management

To ensure appropriate implementation of this master protocol, the following actions will be conducted: (i) development of site-specific study management plans including details of the roles and responsibilities of the study/evaluation team (the composition and number of study team members will be adapted at each site according to local need); ii) WHO monitoring visits and monitoring procedures to assess the progress and quality of the study at each evaluation site; iii) an external quality assurance process to standardise reference testing results from different sites by use of proficiency panels sent by the Centres for Disease Prevention and Control in the United States (a WHO reference laboratory); iv) an internal (serum) and external (dried tube specimens) quality assurance process for ensuring accurate performance of the dual HIV/syphilis POC tests; and v) a site-sensitive training programme for all clinic staff in specimen collection and handling including performance and reading of the POCTs as well as familiarisation with the study standard operating procedures.

All data generated will be recorded using WHO standardised CRFs. Paper versions will be stored securely at each study site as per local standard procedures. At regular intervals, data from these CRFs will be entered by a data manager at each site into a WHO provided secured laptop using OpenClinica software. Once data entry is complete, local data managers will be requested to re-enter a random allocation of data to reduce data entry error. Once both enrolment and data entry are complete, the dataset will be de-identified.

Archiving (including destruction) of paper versions of the CRFs will be determined by the evaluation sites' own procedures.

## Data analysis

Data analysis will be guided by QUADAS-2 principles.[17] Sensitivity, specificity, positive predictive values (PPV), negative predictive values (NPV), likelihood ratio of a positive test (LR+) and likelihood ratio of a negative test (LR-) for each rapid test component will be estimated comparing the POCT results with the gold standard laboratory test results. Each rapid test component will be then compared with the respective gold standard, namely POCT treponemal versus laboratory-based treponemal (TPPA) for syphilis and POCT HIV result versus laboratory-based HIV EIA and/or immunoblot. 95% CIs of each estimate will be calculated.

1  
2  
3 To validate the reading of the POCT outcome variable, the concordance between the R1-R2 readings will be  
4  
5 estimated by calculating percentage agreement (concordance) and Cohen's Kappa ( $\kappa$  for binary variables).  
6  
7 Cohen's  $\kappa$  represents a measure of inter-rater agreement, ranging from  $-1$  to  $+1$ , where  $0$  is the level of  
8  
9 agreement that can be expected in case of random chance.  
10

## 11 12 13 **PATIENT AND PUBLIC INVOLVEMENT**

14  
15 Patients, representatives of communities and healthcare staff were consulted during the development of this  
16  
17 master protocol specifically regarding participant recruitment and approach. Additional consultations were  
18  
19 held during adaptation of the master protocol to individual sites.  
20  
21  
22  
23  
24  
25

## 26 **ETHICS AND DISSEMINATION**

27  
28  
29  
30 This master protocol was independently peer reviewed and approved by the Research Project Review Panel  
31  
32 (RP2) of the WHO Department of Sexual and Reproductive Health and Research (SRH) and by the WHO  
33  
34 Ethics Review Committee (ERC). The protocol will be adjusted accordingly to individual countries and  
35  
36 adapted protocols be approved by both RP2 and ERC, as well as all relevant ethics committees at each  
37  
38 participating site. As the study's procedures generally follow standard of care pathways at each clinic-site,  
39  
40 minimal risks are foreseen. However, one potential risk identified by the WHO ERC was the recruitment of  
41  
42 participants from key populations, particularly MSM, in countries where self-identification as MSM could  
43  
44 cause harm for study participants. Therefore, sites will only be included in the study if they have experience  
45  
46 of working with key populations, which is reviewed as part of the initial site-assessment. Some patients  
47  
48 might experience a small amount of transient discomfort when the finger-prick blood sample is taken for use  
49  
50 with the two POCTs. All data and records are to be used only for the purpose of the research project. Names  
51  
52 will not be used on any study form or label on laboratory specimens or in any report resulting from the study.  
53  
54 At the beginning of the study, a unique study identification number will be assigned to each participant. This  
55  
56 number will be used to link the different types of data collected for each participant (demographic and  
57  
58 behavioural information, biological samples) and their POCT and reference test results.  
59  
60



1  
2  
3 All information/data obtained will be kept confidential. Only members of the clinic study team (HCPs) will  
4 have access to information linking a name with a study number. All participants will provide written  
5 informed consent and may withdraw from the study at any time without affecting the medical care they  
6 receive from the clinical team. There will be no immediate benefits to research participants by taking part in  
7 the study. However, when the study results are known and if the POCTs are found to be acceptable in terms  
8 of accuracy, patients may benefit from being able to access a validated dual POCT available to screen  
9 simultaneously for HIV and syphilis, and receive treatment if indicated.  
10  
11  
12  
13  
14  
15  
16  
17  
18  
19

20 Evaluation results will be published in a WHO report for member states and posted on the WHO website.  
21 Local and global findings of the HIV/syphilis POCT validation study will be presented during  
22 national/international scientific meetings and will be published in peer-reviewed international journals. A  
23 further accessible community report will be developed for participants interested in the study and other  
24 interested parties.  
25  
26  
27  
28  
29  
30  
31

## 32 **DISCUSSION**

33  
34  
35  
36

37 There has been rapid development during the last decade to develop new diagnostic tools which can be  
38 administered at the point-of-care and that are affordable, sensitive, specific, user-friendly, rapid, equipment-  
39 free, deliverable (ASSURED).[20, 21] To date a rich pipeline of promising diagnostic products is emerging  
40 although some products are stalled early in the development process, and few have been evaluated robustly  
41 in real-life settings. This has arguably not only led to a lag in the integrated scale-up of POCTs in public  
42 health strategic planning, but has also meant that there is still no formal WHO guidance and  
43 recommendations available regarding the placement of these new tools in the diagnostic pathway of  
44 HIV/STIs.  
45  
46  
47  
48  
49  
50  
51  
52  
53  
54

55 This paper describes the master protocol of the ProSPeRo study; to conduct a clinic-based evaluation  
56 assessing the performance and acceptability of two dual POCTs for the screening of HIV and syphilis in  
57 MSM, SW, and PW. The study will offer a potentially important contribution to the WHO Global Health  
58  
59  
60

1 Sector Strategy on STIs (2016–21) as well as the Sustainable Development Goals (particularly SDG 3).  
2  
3 Specifically, the ProSPeRo findings and publications (expected from 2022) will contribute to the evidence  
4  
5 needed to develop the guidance for WHO Member States and other relevant public health institutions on STI  
6  
7 diagnostic tests that can be used at the point-of-care. The study will also contribute to the development of a  
8  
9 high-quality standardised evaluation approach for POCTs in laboratory and real-world settings. A robust  
10  
11 evidence-based framework has been highlighted as a priority for the advancement of development and global  
12  
13 uptake of POCTs for STIs.[7] Longer term the findings of ProSPeRo may contribute to a gradual shift  
14  
15 towards the decentralisation of health systems as STI POCTs within national STI programmes are  
16  
17 implemented further and scaled up. Such decentralisation can have considerable advantages regarding  
18  
19 accessibility of services and follow-up, as well as relieving pressures on over-stretched health systems,  
20  
21 particularly in terms of personnel, infrastructure and ensuring quality of service.  
22  
23  
24  
25

## 26 **Conclusion**

27  
28 For STI POC diagnostic research to proceed, the creation of a robust infrastructure for real-world evaluation  
29  
30 is required that follows a rigorous and standardised approach including the use of gold-standard reference  
31  
32 testing. The WHO ProSPeRo study including this master protocol, offers such an approach for real-world  
33  
34 evaluations of POC diagnostic tools, that can be used by researchers and clinicians both within, and external  
35  
36 to, the ProSPeRo network.  
37  
38  
39  
40

41 **Acknowledgments:** The authors are grateful to members of the WHO Research Project Review Panel (RP2)  
42  
43 and the WHO Research Ethics Review Committee (WHO ERC) for their expertise and inputs regarding the  
44  
45 master and site-specific protocols for this clinic-based evaluation. Our gratitude is extended to the global  
46  
47 ProSPeRo network.  
48  
49  
50

## 51 **Author contributions**

52  
53 The first draft of the manuscript was written jointly by NS and AS. IT (chief and principal investigator) and  
54  
55 RP conceived the study and developed the core study protocol. The ProSPeRo network participated in the  
56  
57 design of the study. MC, LG, MM, CB, VP, AH, HO, CC, SV, RK, SM, PK, JH, JV, RB, KB, JK, SST, and  
58  
59  
60

1 IT led/will lead acquisition of data, contributed to adaptation of the master protocol, and commented on  
2 previous versions of the manuscript. All authors read and approved the final manuscript prior to submission.  
3  
4  
5  
6

7 **\*ProSPeRo Network** (Project on Sexually Transmitted Infection Point-of-care Testing established by the  
8 Reproductive Health and Research Department of WHO): *Italy*: Maddalena Cordioli, Lorenzo Gios,  
9 Massimo Mirandola. *Malta*: Christopher Barbara, Valeska Padovese. *Morocco*: Amina Hançali, Hicham  
10 Oumzi. *Peru*: Carlos Caceres, Silver Vargas. *South Africa*: Ranmini Kularatne. *Uganda*: Simon Mwima,  
11 Peter Kyambadde. *UK*: Jorg Huber, Rosanna Peeling, Alexandra Sawyer, Nigel Sherriff, Jaime Vera. *WHO*:  
12 Ronald Ballard, Karel Blondeel, James Kiarie, Soe Soe Thwin, Igor Toskin.  
13  
14  
15  
16  
17  
18  
19  
20

### 21 **Funding statement**

22 This work received funding from the UNDP-UNFPA-UNICEF-WHO-World Bank Special Programme of  
23 Research, Development and Research Training in Human Reproduction (HRP), a co-sponsored programme  
24 executed by the World Health Organization (WHO).  
25  
26  
27  
28  
29  
30

### 31 **Data availability statement**

32 This study which forms part of a larger programme of research co-ordinated by WHO and for which WHO  
33 acts as the repository of the ensemble of the results obtained from the individual projects. In view of this, all  
34 rights to the results of the study, including but not limited to copyright and the right to apply for, hold and  
35 exercise patent rights in respect of any invention resulting from the study, are the subject of co-ownership  
36 and responsibility between the WHO and respective country sites. Dr Igor Toskin is the Chief Investigator  
37 and contact for data availability queries ([toskini@who.int](mailto:toskini@who.int)).  
38  
39  
40  
41  
42  
43  
44  
45  
46  
47

48 **Competing interests statement:** The POCT manufacturers disclose and furnish free of charge to WHO the  
49 information and sufficient quantities of the product(s) in order to enable this evaluation as part of the  
50 WHO/RHR STI POC initiative. WHO is entitled to evaluate and publish the trial results, and to exclusively  
51 control this evaluation and the content of the aforesaid publication. WHO shall submit any proposed  
52 publication to the manufacturers for review, comments received will be considered in good faith, but the  
53 decision to publish rests with WHO.  
54  
55  
56  
57  
58  
59  
60

1 **Disclaimer:** Some of the authors are staff members of the World Health Organization. The authors alone are  
2  
3 responsible for the views expressed in this publication and they do not necessarily represent the views,  
4  
5 decisions or policies of the World Health Organization.  
6  
7

8  
9 **Word Count:** 3983  
10  
11  
12  
13  
14  
15  
16  
17  
18  
19  
20  
21  
22  
23  
24  
25  
26  
27  
28  
29  
30  
31  
32  
33  
34  
35  
36  
37  
38  
39  
40  
41  
42  
43  
44  
45  
46  
47  
48  
49  
50  
51  
52  
53  
54  
55  
56  
57  
58  
59  
60

For peer review only

**FIGURES**

**Figure 1.** Bioline POCT kit

**Figure 2.** Chembio POCT kit

**Figure 3.** Chembio DPP Micro Reader

**Figure 4.** Patient flowchart for a clinic-based evaluation of two dual HIV/syphilis POCTs

For peer review only

**REFERENCES**

1. Dunseth CD, Ford BA, Krasowski MD. Traditional versus reverse syphilis algorithms: A comparison at a large academic medical center. *Pract Lab Med.* 2017;8:52-9 DOI: 10.1016/j.plabm.2017.04.007.
2. Cristillo AD, Bristow CC, Peeling R, et al. Point-of-care sexually transmitted infection diagnostics: Proceedings of the STAR sexually transmitted infection—clinical trial group programmatic meeting. *Sex Transm Dis.* 2017;44(4):211 DOI: 10.1097/OLQ.0000000000000572.
3. Toskin I, Govender V, Blondeel K, et al. Call to action for health systems integration of point-of-care testing to mitigate the transmission and burden of sexually transmitted infections. *Sex Transm Infect.* 2020;96:342-7 DOI: 10.1136/sextrans-2019-054358.
4. World Health Organization. WHO information note on the use of dual HIV/Syphilis rapid diagnostic tests (RDT). Geneva: World Health Organization; 2017.  
<https://www.who.int/reproductivehealth/publications/rtis/dual-hiv-syphilis-diagnostic-tests/en/>
5. Fleming E, Oremo J, O'Connor K, et al. The impact of integration of rapid syphilis testing during routine antenatal services in rural Kenya. *J Sex Transm Dis.* 2013;2013 DOI: 10.1155/2013/674584.
6. Dinh T-H, Kamb ML, Msimang V, et al. Integration of preventing mother-to-child transmission of HIV and syphilis testing and treatment in antenatal care services in the Northern Cape and Gauteng provinces, South Africa. *Sex Transm Dis.* 2013;40(11):846 DOI: 10.1097/OLQ.0000000000000042
7. Toskin I, Blondeel K, Peeling RW, et al. Advancing point of care diagnostics for the control and prevention of STIs: the way forward. *Sex Trans Infect.* 2017;93(S4):S81-S8 DOI: 10.1136/sextrans-2016-053073.
8. Van Den Heuvel A, Smet H, Prat I, et al. Laboratory evaluation of four HIV/syphilis rapid diagnostic tests. *BMC Infect Dis.* 2019;19(1):1 DOI: 10.1186/s12879-018-3567-x.
9. Bristow CC, Adu-Sarkodie Y, Ondondo RO, et al. Multisite laboratory evaluation of a dual human immunodeficiency virus (HIV)/syphilis point-of-care rapid test for simultaneous detection of HIV and syphilis infection. *Open Forum Infect Dis.* 2014;1(1):ofu015 DOI: 10.1093/ofid/ofu015.

- 1 10. Bristow CC, Leon SR, Huang E, et al. Field evaluation of a dual rapid diagnostic test for HIV  
2 infection and syphilis in Lima, Peru. *Sex Trans Infect.* 2016;92(3):182-5 DOI: 10.1136/sextrans-2015-  
3 052326.  
4
- 5 11. Zorzi A, Cordioli M, Gios L, et al. Field evaluation of two point-of-care tests for syphilis among  
6 men who have sex with men, Verona, Italy. *Sex Trans Infect.* 2017;93(S4):S51-S8 DOI: 10.1136/sextrans-  
7 2016-053065.  
8
- 9 12. Jacobsson S, Boiko I, Golparian D, et al. WHO laboratory validation of Xpert® CT/NG and Xpert®  
10 TV on the GeneXpert system verifies high performances. *Apmis.* 2018;126(12):907-12 DOI:  
11 10.1111/apm.12902.  
12
- 13 13. World Health Organization. Consolidated guidelines on the use of antiretroviral drugs for treating  
14 and preventing HIV infection: Recommendations for a public health approach – Second Edition. Geneva:  
15 World Health Organization; 2016. <https://www.who.int/hiv/pub/arv/arv-2016/en/>  
16
- 17 14. European Centre for Disease Prevention and Control. HIV infection and AIDS. In: ECDC. Annual  
18 epidemiological report for 2017. Stockholm: European Centre for Disease Prevention and Control; 2019.  
19 <https://www.ecdc.europa.eu/en/publications-data/hiv-infection-and-aids-annual-epidemiological-report-2017>  
20
- 21 15. Centers for Disease Control and Prevention. Sexually Transmitted Disease Surveillance 2018.:  
22 Centers for Disease Control and Prevention; 2019. <https://www.cdc.gov/std/stats18/default.htm>  
23
- 24 16. World Health Organization. Global guidance on criteria and processes for validation: elimination of  
25 mother-to-child transmission of HIV and syphilis. Geneva: World Health Organization; 2014.  
26 <http://apps.who.int/iris/handle/10665/112858>  
27
- 28 17. Whiting PF, Rutjes AW, Westwood ME, et al. QUADAS-2: a revised tool for the quality assessment  
29 of diagnostic accuracy studies. *Ann Intern Med.* 2011;155(8):529-36 DOI: 10.7326/0003-4819-155-8-  
30 201110180-00009.  
31
- 32 18. World Health Organization. Prequalification of In Vitro Diagnostics Programme, Public Report.  
33 Geneva: World Health Organization; 2017.  
34 [https://www.who.int/diagnostics\\_laboratory/evaluations/151028\\_final\\_report\\_0179-012-  
35 00\\_sd\\_bioline\\_hiv\\_syphilis2.pdf?ua=1](https://www.who.int/diagnostics_laboratory/evaluations/151028_final_report_0179-012-00_sd_bioline_hiv_syphilis2.pdf?ua=1)  
36
- 37 19. Banoo S, Bell D, Bossuyt P, et al. Evaluation of diagnostic tests for infectious diseases: general  
38 principles. *Nat Rev Microbiol.* 2006;4(12):S20-S32 DOI: 10.1038/nrmicro1523.  
39  
40  
41  
42  
43  
44  
45  
46  
47  
48  
49  
50  
51  
52  
53  
54  
55  
56  
57  
58  
59  
60

- 1 20. Peeling RW, Holmes KK, Mabey D, et al. Rapid tests for sexually transmitted infections (STIs): the  
2 way forward. Sex Trans Infect. 2006;82(suppl 5):v1-v6 DOI: 10.1136/sti.2006.024265.  
3  
4  
5 21. Land KJ, Boeras DI, Chen X-S, et al. REASSURED diagnostics to inform disease control strategies,  
6 strengthen health systems and improve patient outcomes. Nat Microbio. 2019;4(1):46-54 DOI:  
7  
8 10.1038/s41564-018-0295-3.  
9  
10  
11  
12  
13  
14  
15  
16  
17  
18  
19  
20  
21  
22  
23  
24  
25  
26  
27  
28  
29  
30  
31  
32  
33  
34  
35  
36  
37  
38  
39  
40  
41  
42  
43  
44  
45  
46  
47  
48  
49  
50  
51  
52  
53  
54  
55  
56  
57  
58  
59  
60

For peer review only



1  
2  
3  
4  
5  
6  
7  
8  
9  
10  
11  
12  
13  
14  
15  
16  
17  
18  
19  
20  
21  
22  
23  
24  
25  
26  
27  
28  
29  
30  
31  
32  
33  
34  
35  
36  
37  
38  
39  
40  
41  
42  
43  
44  
45  
46  
47  
48  
49  
50  
51  
52  
53  
54  
55  
56  
57  
58  
59  
60

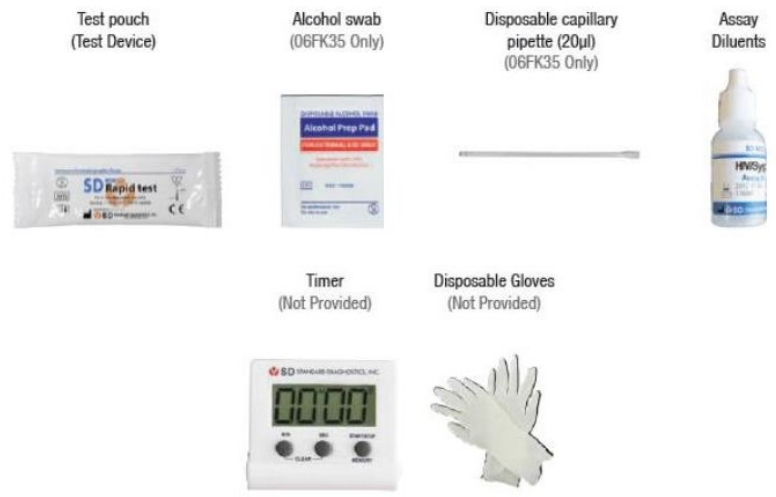

Figure 1. Bioline POCT kit  
228x137mm (96 x 96 DPI)

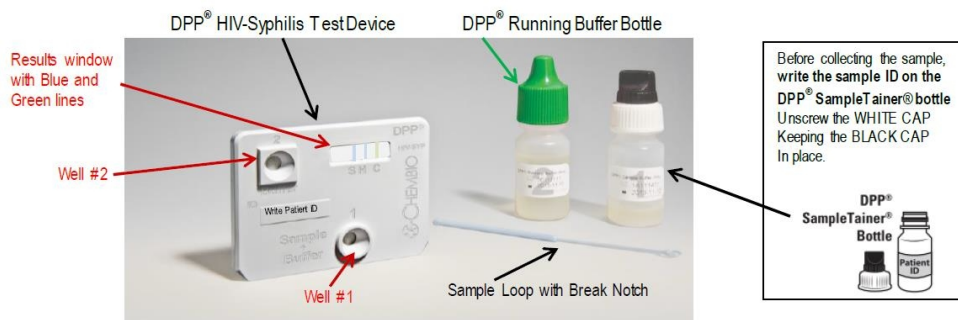

Figure 2. Chembio POCT kit

104x34mm (288 x 288 DPI)

1  
2  
3  
4  
5  
6  
7  
8  
9  
10  
11  
12  
13  
14  
15  
16  
17  
18  
19  
20  
21  
22  
23  
24  
25  
26  
27  
28  
29  
30  
31  
32  
33  
34  
35  
36  
37  
38  
39  
40  
41  
42  
43  
44  
45  
46  
47  
48  
49  
50  
51  
52  
53  
54  
55  
56  
57  
58  
59  
60

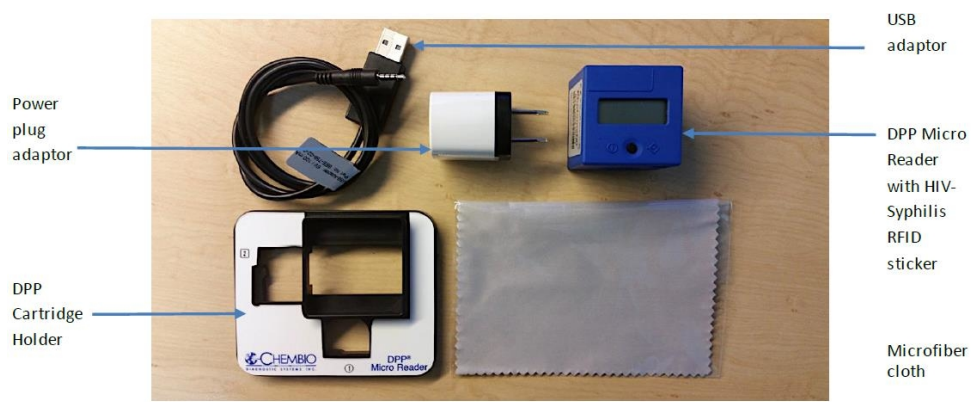

Figure 3. Chembio DPP Micro Reader  
102x43mm (288 x 288 DPI)

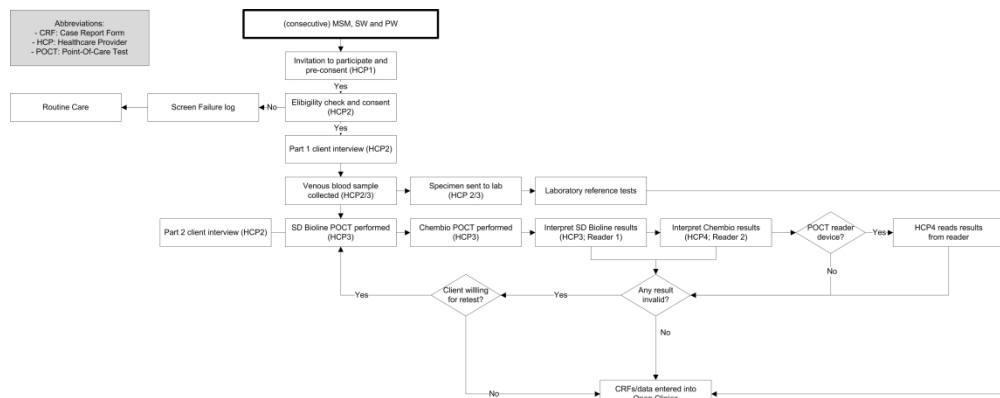

Figure 4. Patient flowchart for a clinic-based evaluation of two dual HIV/syphilis POCTs

360x143mm (300 x 300 DPI)

# BMJ Open

**A standardised protocol for a prospective cross-sectional multi-centre clinic-based evaluation of two dual point-of-care tests for the screening of HIV and syphilis in men who have sex with men, sex workers, and pregnant women**

|                                 |                                                                                                           |
|---------------------------------|-----------------------------------------------------------------------------------------------------------|
| Journal:                        | <i>BMJ Open</i>                                                                                           |
| Manuscript ID                   | bmjopen-2020-044479.R1                                                                                    |
| Article Type:                   | Protocol                                                                                                  |
| Date Submitted by the Author:   | 13-Oct-2020                                                                                               |
| Complete List of Authors:       | Sherriff, Nigel; University of Brighton, School of Health Sciences                                        |
| <b>Primary Subject Heading</b>: | Infectious diseases                                                                                       |
| Secondary Subject Heading:      | Global health, Public health, Sexual health                                                               |
| Keywords:                       | HIV & AIDS < INFECTIOUS DISEASES, Public health < INFECTIOUS DISEASES, INFECTIOUS DISEASES, PUBLIC HEALTH |
|                                 |                                                                                                           |

SCHOLARONE™  
Manuscripts



I, the Submitting Author has the right to grant and does grant on behalf of all authors of the Work (as defined in the below author licence), an exclusive licence and/or a non-exclusive licence for contributions from authors who are: i) UK Crown employees; ii) where BMJ has agreed a CC-BY licence shall apply, and/or iii) in accordance with the terms applicable for US Federal Government officers or employees acting as part of their official duties; on a worldwide, perpetual, irrevocable, royalty-free basis to BMJ Publishing Group Ltd ("BMJ") its licensees and where the relevant Journal is co-owned by BMJ to the co-owners of the Journal, to publish the Work in this journal and any other BMJ products and to exploit all rights, as set out in our [licence](#).

The Submitting Author accepts and understands that any supply made under these terms is made by BMJ to the Submitting Author unless you are acting as an employee on behalf of your employer or a postgraduate student of an affiliated institution which is paying any applicable article publishing charge ("APC") for Open Access articles. Where the Submitting Author wishes to make the Work available on an Open Access basis (and intends to pay the relevant APC), the terms of reuse of such Open Access shall be governed by a Creative Commons licence – details of these licences and which [Creative Commons](#) licence will apply to this Work are set out in our licence referred to above.

Other than as permitted in any relevant BMJ Author's Self Archiving Policies, I confirm this Work has not been accepted for publication elsewhere, is not being considered for publication elsewhere and does not duplicate material already published. I confirm all authors consent to publication of this Work and authorise the granting of this licence.

1 **A standardised protocol for a prospective cross-sectional multi-centre clinic-based evaluation of two dual**  
2 **point-of-care tests for the screening of HIV and syphilis in men who have sex with men, sex workers, and**  
3 **pregnant women**  
4

5 **Group Author: ProSPeRo Network\*** (Project on Sexually Transmitted Infection Point-of-care Testing  
6 established by the Sexual and Reproductive Health and Research Department of WHO):  
7

8  
9 **Correspondence to:** Professor Nigel Sherriff, School of Health Sciences, University of Brighton, Westlaine  
10 House, Room 364, Village way, Falmer, BN1 9PH, United Kingdom. Email: [n.s.sherriff@brighton.ac.uk](mailto:n.s.sherriff@brighton.ac.uk); Tel:  
11 +44(0)1273 644539  
12

13  
14 **Word Count:** 3983  
15  
16  
17  
18  
19  
20  
21  
22  
23  
24  
25  
26  
27  
28  
29  
30  
31  
32  
33  
34  
35  
36  
37  
38  
39  
40  
41  
42  
43  
44  
45  
46  
47  
48  
49  
50  
51  
52  
53  
54  
55  
56  
57  
58  
59  
60

For peer review only

**ABSTRACT**

**Introduction:** Dual point-of-care tests (POCTs) for detecting antibodies to HIV and syphilis have been developed for use with venous whole blood, serum/plasma, or finger-prick capillary whole blood. Several tests are commercially available showing encouraging performance compared to ‘gold-standard’ reference tests in laboratory-based studies. However, data on their performance in the field is limited. This prospective cross-sectional study will conduct a clinic-based evaluation to assess the performance characteristics and acceptability to end-users of two dual HIV/syphilis POCTs for the screening of HIV and syphilis amongst men who have sex with men (MSM), sex workers (SW), and pregnant women (PW). This master protocol outlines the overall research approach that will be used in seven countries.

**Method and analyses:** MSM, SW, and PW presenting at clinic evaluation sites in high, low- and middle-income countries (LMICs) will be enrolled. The (WHO pre-approved) POCTs to be evaluated are SD Bioline HIV/Syphilis Duo (Abbott) and DPP HIV-Syphilis Assay (Chembio). Finger prick blood will be collected to perform POCTs and compared with laboratory results (venepuncture blood). Procedures will be carried out by trained healthcare staff and tests performed according to the manufacturers’ directions. Sample size was calculated based on local prevalence of HIV and syphilis. The sensitivity, specificity, positive and negative predictive values for each POCT will be calculated. The study is ongoing with recruitment expected to be completed in all countries by mid to late 2021.

**Ethics and dissemination:** This core protocol was independently peer reviewed and approved by the Research Project Review Panel (RP2) of the WHO Department of Sexual and Reproductive Health and Research (SRH) and by the WHO Ethics Review Committee (ERC). The protocol has been adapted to individual countries and approved by RP2, ERC, and institutional review boards at each site. Results will be disseminated through peer-reviewed journals and relevant conferences.

**Key words:** HIV; Syphilis; Public Health; Point-of-Care-Tests; Men who have Sex with Men; Pregnant Women; Sex Workers; Evaluation.



## Article Summary

### Strengths and limitations of this study

- To our knowledge, the study is the first independent multi-centre and multi-country clinic-based evaluation of dual HIV/syphilis POCTs for the screening of men who have sex with men, sex workers, and pregnant women.
- The clinic-based evaluation protocol design more accurately reflects real-world conditions and therefore has greater potential to demonstrate the dual POCTs' practical value as a screening tool, compared to laboratory-based evaluations.
- Although dual HIV/syphilis POCTs can be convenient for patients, treponemal antibodies persist following successful treatment of syphilis. Therefore, additional treponemal and non-treponemal tests may still be required for correctly identifying active infections.
- The public health significance of this study is based on the premise that it will evaluate the performance characteristics of two dual POCTs in field settings, as well as enable assessment of operational characteristics by healthcare workers and acceptability to patients.
- The study will identify opportunities to support the WHO Global Health Sector Strategy on Sexually Transmitted Infections, 2016–21.

## INTRODUCTION

Serological tests are the diagnostic tests of choice for both syphilis and HIV. For syphilis, two serological tests (treponemal and non-treponemal) are used for laboratory diagnosis. Traditionally, a non-treponemal assay is used for screening and a specific treponemal assay is then used for confirmation. However, with increasing automation and decreasing cost, some institutions use the 'reverse' algorithm whereby initial screening is performed with automated treponemal enzyme linked or chemiluminescence immunoassays. If reactive, it is followed by a second manual non-treponemal test such as the Rapid Plasma Reagin (RPR) assay to assess disease activity.[1]

With respect to HIV diagnosis, two different rapid lateral flow immunochromatographic assays or automated enzyme immunoassays (EIAs) are used in tandem for screening and confirmation. In some settings, a Western blot (WB) assay is performed for the confirmation of a positive result. However, some of these tests are technically demanding and require laboratory equipment that is not always widely available in resource-limited settings. Therefore in recent years, there has been considerable effort to develop new diagnostic tools including point-of-care tests (POCTs) which can be used outside of a typical clinical laboratory (e.g. a physician's office, hospital bedside, patient's home, in the field/community based), by non-laboratory trained healthcare providers.[2] Over the last decade, many POCTs for sexually transmitted infections (STIs) have been developed and are commercially available.[3] Guidance or recommendations regarding the placement of these new tests in the diagnostic pathway for STIs is limited, however interim recommendations on the use of POCTs among pregnant women are available.[4] Furthermore, although validated and licensed rapid HIV assays are commercially available and widely used in the field, they are stand-alone and do not offer the function of dual screening. As a result, syphilis testing coverage may be suboptimal relative to HIV. Integrated testing services will improve testing coverage.[5, 6] The WHO Global Health Sector Strategy on STIs acknowledged the lack of reliable, low-cost POCTs as a major barrier to advancing STI control and prevention.[7]

As HIV and syphilis can be asymptomatic, sensitive diagnostic testing is crucial for early detection and diagnosis, and for the guidance of treatment and prevention of onward transmission.[8] Dual tests that can be used at the point-of-care for simultaneously detecting antibodies to HIV and syphilis (dual HIV/syphilis POCTs)

1 have been developed for use with finger prick capillary whole blood. To date, they have shown encouraging  
2 performance compared to 'gold-standard' diagnostic reference tests in laboratory-based studies; but there is  
3 limited data on their performance in the field.[9, 10] Field studies in real-world settings are important because  
4 the performance of POCTs, including positive predictive values and negative predictive values, can be  
5 influenced by epidemiological and environmental factors. Both operational characteristics of the test and human  
6 factors, such as the ability to follow properly the POCT procedures (e.g. taking whole blood finger prick  
7 specimens, correct timing of adding the buffer and reading the result, and interpreting results accurately), can  
8 interfere with the performance of a POCT.[11] Evaluation of the performance of these dual tests in clinic-based  
9 settings and their acceptability to patients and healthcare providers is therefore a high priority. The need for  
10 standardised high quality evaluations of POCTs was identified by two technical consultations as crucial for the  
11 development and global uptake of POCTs for STIs.[7]

12  
13  
14  
15  
16  
17  
18  
19  
20  
21  
22  
23  
24  
25  
26 Consequently, the SRH Department of WHO has established the global ProSPeRo study (global Project on STI  
27 POCT). The overall objectives are to: i) advise WHO Member States and other public health institutions on the  
28 performance characteristics of commercially available STI diagnostic tests that can be used at the point-of-care;  
29 ii) assess the feasibility, acceptability of POCTs by both health care providers and clients/patients; and iii)  
30 support further implementation and roll-out of STI POCTs within national STI programmes by the provision of  
31 technical assistance tools.

32  
33  
34  
35  
36  
37  
38  
39  
40  
41 ProSPeRo comprises three core components: i) a laboratory-based arm assessing the performance characteristics  
42 of STI POCTs that have not yet been evaluated independently in the laboratory;[12] ii) a clinical-based  
43 component to evaluate STIs POCT performance in the field compared with that of gold-standard laboratory tests  
44 among several STI high-risk and vulnerable populations worldwide, and; iii) a clinical-utility component  
45 assessing the feasibility and acceptability of STI POCTs among men who have sex with men (MSM) in non-  
46 clinical settings in four countries within the WHO European region.

47  
48  
49  
50  
51  
52  
53  
54  
55 This master protocol refers to the second component of ProSPeRo, a clinic-based evaluation of dual POCTs for  
56 the screening of HIV and syphilis in MSM, sex workers (SW) and pregnant women (PW). These groups were  
57 identified as those most in need of increased access to testing based on a series of consultations led by WHO,  
58  
59  
60

1 which considered definitions of key and vulnerable populations [13] and the epidemic trends of HIV/STIs  
2 amongst them.[14, 15] Furthermore, elimination of mother-to-child-transmission of syphilis and HIV is  
3 considered to be one of the most cost-effective public health interventions, and WHO guidance for country-level  
4 action includes targets for the screening and treatment of PW.[16]  
5  
6  
7  
8  
9

10  
11 A clinic-based evaluation is used to determine test performance when the test is performed by clinic personnel  
12 who are not trained laboratory technicians. This paper outlines the master protocol within ProSPeRo, describing  
13 the overall research approach that will be used for a clinic-based evaluation of dual POCTs for the screening of  
14 HIV and syphilis in MSM, SW, and PW. The protocol was developed using the QUADAS-2 framework, a  
15 quality assessment tool for primary diagnostic accuracy studies.[17] The protocol will be adapted accordingly  
16 for individual countries taking part.  
17  
18  
19  
20  
21  
22  
23  
24  
25

## 26 **Objectives**

27  
28 The primary objectives of this clinic-based evaluation are to assess: i) the performance of two dual POCTs for  
29 the screening of HIV and syphilis in MSM, SW, and PW using finger prick capillary whole blood compared to  
30 reference laboratory-based serum tests for HIV and syphilis (HIV 1/2 EIA and the treponemal reference test),  
31 and; ii) the minimal operational characteristics and acceptability of these dual HIV-syphilis POCTs to both  
32 patients and healthcare providers. A secondary objective is to explore the performance and the potential utility  
33 of these dual HIV-syphilis POCTs in identifying active syphilis using a combination of non-treponemal and  
34 treponemal tests as a comparator.  
35  
36  
37  
38  
39  
40  
41  
42  
43  
44

## 45 **METHODS AND ANALYSIS**

### 46 47 48 49 **Study Setting and Design**

50  
51 This clinic-based evaluation is a multi-site, observational, cross-sectional study of MSM, SW, and PW  
52 presenting at sexual health and antenatal clinics for HIV/STI screening according to national guidelines. The  
53 study will be implemented across multiple countries and in some countries, at multiple sites, on the basis of  
54 locally adapted protocols. For the purposes of this protocol, the term study site or evaluation site refers to an  
55 individual clinic (sexual health or antenatal).  
56  
57  
58  
59  
60

1  
2  
3 This paper is the master protocol and outlines the overall research approach which will be adapted accordingly  
4 for individual countries. Seven international sites have been approved by WHO in consultation with in-country  
5 researchers and providers as well as local authorities and WHO Country Offices (Italy, UK, Malta, Peru,  
6  
7 Uganda, Morocco, South Africa). A standardised site-assessment is implemented as part of the approval process  
8  
9 for sites expressing an interest to participate. Site-specific protocols are developed with WHO and the in-  
10  
11 country principle investigator to agree and delineate the range of parameters and the minor changes needed to  
12  
13 adapt the study to the local context whilst complying with this master protocol. The study is ongoing with  
14  
15 recruitment expected to be completed in all countries by mid to late 2021.  
16  
17  
18  
19  
20  
21

## 22 **Study Participants**

### 23 *Inclusion criteria*

24  
25 The target populations are MSM, SW, and PW. The term MSM is used to describe those males who have sex  
26 with other males, regardless of whether or not they have sex with women or have a personal or social identity  
27 associated with that behaviour, such as being 'gay' or 'bisexual'. Sex work is the provision of sexual services  
28 for money or goods. SW are women/men who receive money or goods in exchange for sexual services, and who  
29 consciously define those activities as income-generating even if they do not consider sex work as their  
30 occupation. Antibiotic usage in participants who have been prescribed treatment for syphilis or other infections  
31 three weeks prior to study entry will be recorded in the data collection form but not used as a criterion for  
32 exclusion. All participants have to be at least 18 years old to participate.  
33  
34  
35  
36  
37  
38  
39  
40  
41  
42  
43  
44

45 Healthcare staff who administer the POCTs will also be asked to complete a short questionnaire to evaluate the  
46 operational characteristics (Table 1). In order to be eligible to complete this they need to have been trained in  
47 and administered the POCTs and give consent to complete the questionnaire.  
48  
49  
50  
51  
52

### 53 *Exclusion criteria*

54  
55 MSM, SW, PW, and healthcare staff who refuse to give consent, are younger than 18 years, and/or have  
56 previously participated in the study.  
57  
58  
59  
60

## Description of the POCTs under evaluation

The tests to be evaluated are SD Bioline HIV/Syphilis Duo (Abbott Diagnostics, United States; hereafter termed Bioline POCT) and Chembio Dual Path Platform (DPP) HIV–Syphilis Assay (Chembio, United States; hereafter termed Chembio POCT). Both are single-use qualitative immunochromatographic assays for the simultaneous detection of HIV and syphilis (treponemal component) in human serum, plasma, whole venous or fingerpicked blood. The Bioline POCT (Figure 1) detects antibodies of all isotypes (IgG, IgM, IgA) against HIV specific antigens (HIV-1 gp41, sub O, HIV-2 gp36) and specific IgG and IgM antibodies against a 17 kilodalton recombinant *Treponema pallidum* antigen (*rTp17* kDa). In 2015 this test was accepted for the WHO list of prequalified in vitro diagnostics.[18] The Chembio POCT detects specific antibodies against HIV types 1 and 2 (HIV 1/2) and *Treponema pallidum* (Figure 2). Recently, the Chembio company developed the DPP Micro Reader (MR) to complete the Chembio DPP technology and minimise error due to subjective visual interpretation (Figure 3). The MR is a portable battery-powered cubic reflectance reader with a liquid crystal display. The display shows the status of the instrument and test result to the operator, and a multi-function button on top turns on the MR and guides the operator. The device is fitted to the Chembio POCT via a dedicated holder. The MR scans the Chembio POCT cartridge, verifies the presence of line(s) at the control and each of the test line positions and measures numerically the optical density of each test line(s). The device interprets the results comparing the optical density with that of a scoring algorithm, translating it into a numerical value. This number is compared with that of the set cut-off (> 20 for the HIV component, > 10 for the treponemal component) and if higher, the POCT result is displayed as reactive (R), otherwise, as non-reactive (NR). If the MR reading phase is not successful, the displayed result is invalid (I).

FIGURES 1, 2, AND 3 ABOUT HERE

**Table 1.** Acceptability questions and operational characteristics

| <b>Healthcare staff – operational characteristics</b>                                                                                   |
|-----------------------------------------------------------------------------------------------------------------------------------------|
| 1. Clarity of kit instructions ( <i>difficult to follow, fairly clear, very clear, excellent</i> )                                      |
| 2. Ease of use ( <i>complicated, fairly easy, very easy, excellent</i> )                                                                |
| 3. Ease of interpretation of results ( <i>difficult, fairly easy, very easy, unambiguous</i> )                                          |
| 4. Rapidity of test results (<20 mins, 20-30 mins, >30 mins)                                                                            |
| 5. Hands on time (<5 mins, 5 mins, 10 mins, >10 mins)                                                                                   |
| 6. Training time required (<30 mins, 30 mins, 1 hour, >1 hour)                                                                          |
| 7. Number of tests needed to be performed before being able to feel comfortable with POCT                                               |
| 8. Overall comment/recommendation ( <i>free text response</i> )                                                                         |
| <b>Patient – acceptability questions</b>                                                                                                |
| 1. Would you be willing to wait for the results at the clinic, directly after the tests are performed? ( <i>yes, no, don't know</i> )   |
| 2. If yes, how long would you be willing to wait? ( <i>up to 20 min, up to 30 min, up to 1 hour, up to 2 hours, don't know, other</i> ) |
| 2.1. If other, please describe                                                                                                          |
| 3. Would you prefer two single tests or one dual test? ( <i>single, dual, it's the same, don't know/don't care</i> )                    |
| 3.1. If you prefer a single test, why? ( <i>don't want to be tested for HIV, don't want to be tested for syphilis, other</i> )          |
| 3.1.1. If other, please describe                                                                                                        |

### Reference laboratory tests

For this master protocol, Bioline and Chembio POCTs HIV/syphilis results will be compared with those of the reference or 'gold-standard' tests for this evaluation; respectively these are laboratory-based HIV 1/2 EIA confirmed by immunoblot (antibody only), and for syphilis the reference test is the TPPA. All reference tests will be performed in accordance with the manufacturer's directions and laboratory staff will be blinded to the POCT results. For the determination of potential utility, a probable active syphilis case is defined as non-Tp (such as RPR test positive at a titre >8), confirmed by TPPA.

### Acceptability of dual POCTs

The acceptability of the dual POCTs to patients will be determined as part of the evaluation using a structured questionnaire. Moreover, at the end of enrolment, operational characteristics will be evaluated by healthcare staff who administer the POCTs via a brief self-completion provider questionnaire. These acceptability questions and operational characteristics are displayed in Table 1.

## Study procedure

### *Recruitment, enrolment, and consent*

For each site, patients will be recruited over nine months (maximum) or until the required sample size is reached. Consecutive MSM, SW, and PW presenting to the clinic for HIV/STI screening at the evaluation sites will be informed about the study by a healthcare provider (HCP 1; see Figure 4 patient flowchart). If they are interested in participating (pre-consent), a second HCP (HCP 2) will evaluate the inclusion criteria and provide a participant information sheet (PIS) and informed consent form (ICF). If the potential participant fits the criteria and agrees to participate, HCP 2 will take final written informed consent and HCP 3 will perform the routine care (below) and the additional tests along with completion of the associated case report forms (CRFs).

### *Specimen collection*

The HCP will undertake a routine examination of the patient according to local clinical procedures. Participants will be asked to complete an acceptability questionnaire. 3-5 ml of venous blood will be collected for reference testing and placed into labelled collection tubes (with anticoagulant that does not interfere with the assays), and then transported to the laboratory in accordance with standard operating procedures at the local site. The venous blood sample will be processed for reference testing within 12 hours of collection or centrifuged and stored at 2-8°C for 5 days maximum.

A capillary whole blood sample will be collected using finger prick blood to perform both POCTs according to the manufacturers' instructions, collecting the required amount of capillary blood using the equipment provided in both test kits and waiting a determined time (measured with a timer for each test) before reading the results. With the finger only being pricked once, the first blood drop will be used for the Bioline test and the second drop for the Chembio test. A double reader method (Reader 1-Reader 2 [R1-R2]) will be adopted for both tests to determine any variability in the interpretation of test results.[11] The MR (Chembio) will be read by R2 only. R1 and R2 will be blind to each other's results and to the clinical history of the patients.



## FIGURE 4 ABOUT HERE

*Follow-up procedure*

Pre- and post-test counselling will be provided to all participants according to WHO recommendations and local clinical practice. Participants will not be informed of their POCT results and the results will not be used for follow-up because the POCTs are being evaluated in the context of already established clinical testing procedures. Patients with a positive reference test result will be treated according to the standards of care described in national guidelines for each evaluation site.

**Outcomes**

*Primary outcome:* The primary outcome is a measure of the performance of two dual POCTs for the screening of HIV and syphilis. Each test component will be considered separately and compared to the respective gold standard. Readings of the first rater (R1) will be considered as the outcome variable for the comparison. *Secondary outcomes:* Two secondary outcomes are as follows: i) the acceptability of the two dual HIV/syphilis POCTs to patients and healthcare providers; ii) the potential utility of two dual HIV/syphilis POCTs in identifying active syphilis using a combination of non-treponemal and treponemal tests.

**Sample size**

The formula used for the sample size calculation is based on the 2006 WHO/TDR expert panel document on the evaluation of new diagnostic methods and techniques.[19] As per the standard approach, the sample size is adjusted for the infection prevalence using the formula  $(100/\text{prevalence} \times \text{sample size using sensitivity/specificity only})$ . For example, if it is estimated that the sensitivity of a new test is 80% compared to the reference standard, then 200 infected study subjects by the reference standard test would need to be recruited for a confidence interval of + 5% around the point estimates of sensitivity and specificity. If the prevalence of infection in the study population is 10%, then there will be 10 infected subjects per 100 healthcare users seen at the clinic. Then 2,000  $(100/10 \times 200)$  participants will need to be recruited.

## Project and data management

To ensure appropriate implementation of this master protocol, the following actions will be conducted: (i) development of site-specific study management plans including details of the roles and responsibilities of the study/evaluation team (the composition and number of study team members will be adapted at each site according to local need); ii) WHO monitoring visits and monitoring procedures to assess the progress and quality of the study at each evaluation site; iii) an external quality assurance process to standardise reference testing results from different sites by use of proficiency panels sent by the Centres for Disease Prevention and Control in the United States (a WHO reference laboratory); iv) an internal (serum) and external (dried tube specimens) quality assurance process for ensuring accurate performance of the dual HIV/syphilis POC tests; and v) a site-sensitive training programme for all clinic staff in specimen collection and handling including performance and reading of the POCTs as well as familiarisation with the study standard operating procedures.

All data generated will be recorded using WHO standardised CRFs. Paper versions will be stored securely at each study site as per local standard procedures. At regular intervals, data from these CRFs will be entered by a data manager at each site into a WHO provided secured laptop using OpenClinica software. Once data entry is complete, local data managers will be requested to re-enter a random allocation of data to reduce data entry error. Once both enrolment and data entry are complete, the dataset will be de-identified.

Archiving (including destruction) of paper versions of the CRFs will be determined by the evaluation sites' own procedures.

## Data analysis

Data analysis will be guided by QUADAS-2 principles.[17] Sensitivity, specificity, positive predictive values (PPV), negative predictive values (NPV), likelihood ratio of a positive test (LR+) and likelihood ratio of a negative test (LR-) for each rapid test component will be estimated comparing the POCT results with the gold standard laboratory test results. Each rapid test component will be then compared with the respective gold standard, namely POCT treponemal versus laboratory-based treponemal (TPPA) for syphilis and POCT HIV result versus laboratory-based HIV EIA and/or immunoblot. 95% CIs of each estimate will be calculated.

1  
2  
3 To validate the reading of the POCT outcome variable, the concordance between the R1-R2 readings will be  
4 estimated by calculating percentage agreement (concordance) and Cohen's Kappa ( $\kappa$  for binary variables).  
5  
6 Cohen's  $\kappa$  represents a measure of inter-rater agreement, ranging from  $-1$  to  $+1$ , where  $0$  is the level of  
7  
8 agreement that can be expected in case of random chance.  
9  
10

## 11 12 13 **PATIENT AND PUBLIC INVOLVEMENT**

14  
15 Patients, representatives of communities and healthcare staff were consulted during the development of this  
16  
17 master protocol specifically regarding participant recruitment and approach. Additional consultations were  
18  
19 held during adaptation of the master protocol to individual sites.  
20  
21  
22  
23  
24  
25

## 26 **ETHICS AND DISSEMINATION**

27  
28  
29  
30 This master protocol was independently peer reviewed and approved by the Research Project Review Panel  
31  
32 (RP2) of the WHO Department of Sexual and Reproductive Health and Research (SRH) and by the WHO  
33  
34 Ethics Review Committee (ERC). It has also been adapted to individual countries and approved by RP2,  
35  
36 ERC, and institutional review boards at each site (see supplementary file). As the study's procedures  
37  
38 generally follow standard of care pathways at each clinic-site, minimal risks are foreseen. However, one  
39  
40 potential risk identified by the WHO ERC was the recruitment of participants from key populations,  
41  
42 particularly MSM, in countries where self-identification as MSM could cause harm for study participants.  
43  
44 Therefore, sites will only be included in the study if they have experience of working with key populations,  
45  
46 which is reviewed as part of the initial site-assessment. Some patients might experience a small amount of  
47  
48 transient discomfort when the finger-prick blood sample is taken for use with the two POCTs. All data and  
49  
50 records are to be used only for the purpose of the research project. Names will not be used on any study form  
51  
52 or label on laboratory specimens or in any report resulting from the study. At the beginning of the study, a  
53  
54 unique study identification number will be assigned to each participant. This number will be used to link the  
55  
56 different types of data collected for each participant (demographic and behavioural information, biological  
57  
58 samples) and their POCT and reference test results.  
59  
60

1  
2  
3 All information/data obtained will be kept confidential. Only members of the clinic study team (HCPs) will  
4 have access to information linking a name with a study number. All participants will provide written  
5 informed consent and may withdraw from the study at any time without affecting the medical care they  
6 receive from the clinical team. There will be no immediate benefits to research participants by taking part in  
7 the study. However, when the study results are known and if the POCTs are found to be acceptable in terms  
8 of accuracy, patients may benefit from being able to access a validated dual POCT available to screen  
9 simultaneously for HIV and syphilis, and receive treatment if indicated.  
10  
11  
12  
13  
14  
15  
16  
17  
18  
19

20 Evaluation results will be published in a WHO report for member states and posted on the WHO website.  
21 Local and global findings of the HIV/syphilis POCT validation study will be presented during  
22 national/international scientific meetings and will be published in peer-reviewed international journals. A  
23 further accessible community report will be developed for participants interested in the study and other  
24 interested parties.  
25  
26  
27  
28  
29  
30  
31

## 32 **DISCUSSION**

33  
34  
35  
36

37 There has been rapid development during the last decade to develop new diagnostic tools which can be  
38 administered at the point-of-care and that are affordable, sensitive, specific, user-friendly, rapid, equipment-  
39 free, deliverable (ASSURED).[20, 21] To date a rich pipeline of promising diagnostic products is emerging  
40 although some products are stalled early in the development process, and few have been evaluated robustly  
41 in real-life settings. This has arguably not only led to a lag in the integrated scale-up of POCTs in public  
42 health strategic planning, but has also meant that there is still no formal WHO guidance and  
43 recommendations available regarding the placement of these new tools in the diagnostic pathway of  
44 HIV/STIs.  
45  
46  
47  
48  
49  
50  
51  
52  
53  
54

55 This paper describes the master protocol of the ProSPeRo study; to conduct a clinic-based evaluation  
56 assessing the performance and acceptability of two dual POCTs for the screening of HIV and syphilis in  
57 MSM, SW, and PW. The study will offer a potentially important contribution to the WHO Global Health  
58  
59  
60

1 Sector Strategy on STIs (2016–21) as well as the Sustainable Development Goals (particularly SDG 3).  
2  
3 Specifically, the ProSPeRo findings and publications (expected from 2022) will contribute to the evidence  
4  
5 needed to develop the guidance for WHO Member States and other relevant public health institutions on STI  
6  
7 diagnostic tests that can be used at the point-of-care. The study will also contribute to the development of a  
8  
9 high-quality standardised evaluation approach for POCTs in laboratory and real-world settings. A robust  
10  
11 evidence-based framework has been highlighted as a priority for the advancement of development and global  
12  
13 uptake of POCTs for STIs.[7] Longer term the findings of ProSPeRo may contribute to a gradual shift  
14  
15 towards the decentralisation of health systems as STI POCTs within national STI programmes are  
16  
17 implemented further and scaled up. Such decentralisation can have considerable advantages regarding  
18  
19 accessibility of services and follow-up, as well as relieving pressures on over-stretched health systems,  
20  
21 particularly in terms of personnel, infrastructure and ensuring quality of service.  
22  
23  
24  
25

26 **Acknowledgments:** The authors are grateful to members of the WHO Research Project Review Panel (RP2)  
27  
28 and the WHO Research Ethics Review Committee (WHO ERC) for their expertise and inputs regarding the  
29  
30 master and site-specific protocols for this clinic-based evaluation. Our gratitude is extended to the global  
31  
32 ProSPeRo network.  
33  
34  
35  
36

### 37 **Author contributions**

38  
39 The first draft of the manuscript was written jointly by NS and AS. IT (chief and principal investigator) and  
40  
41 RP conceived the study and developed the core study protocol. The ProSPeRo network participated in the  
42  
43 design of the study. MC, LG, MM, AZ, CB, VP, AH, HO, CC, SV, RK, SM, PK, JH, JV, RB, KB, JK, SST,  
44  
45 and IT led/will lead acquisition of data, contributed to adaptation of the master protocol, and commented on  
46  
47 previous versions of the manuscript. All authors read and approved the final manuscript prior to submission.  
48  
49  
50

51 **\*ProSPeRo Network** (Project on Sexually Transmitted Infection Point-of-care Testing established by the  
52  
53 Reproductive Health and Research Department of WHO): *Italy*: Maddalena Cordioli, Lorenzo Gios,  
54  
55 Massimo Mirandola, Antonella Zorzi. *Malta*: Christopher Barbara, Valeska Padovese. *Morocco*: Amina  
56  
57 Hançali, Hicham Oumzi. *Peru*: Carlos Caceres, Silver Vargas. *South Africa*: Ranmini Kularatne. *Uganda*:  
58  
59  
60

1 Simon Mwima, Peter Kyambadde. *UK*: Jorg Huber, Rosanna Peeling, Alexandra Sawyer, Nigel Sherriff,  
2  
3 Jaime Vera. *WHO*: Ronald Ballard, Karel Blondeel, James Kiarie, Soe Soe Thwin, Igor Toskin.  
4  
5

### 6 **Funding statement**

7  
8 This work received funding from the UNDP-UNFPA-UNICEF-WHO-World Bank Special Programme of  
9  
10 Research, Development and Research Training in Human Reproduction (HRP), a co-sponsored programme  
11  
12 executed by the World Health Organization (WHO).  
13  
14  
15

### 16 **Data availability statement**

17  
18 This study which forms part of a larger programme of research co-ordinated by WHO and for which WHO  
19  
20 acts as the repository of the ensemble of the results obtained from the individual projects. In view of this, all  
21  
22 rights to the results of the study, including but not limited to copyright and the right to apply for, hold and  
23  
24 exercise patent rights in respect of any invention resulting from the study, are the subject of co-ownership  
25  
26 and responsibility between the WHO and respective country sites. Dr Igor Toskin is the Chief Investigator  
27  
28 and contact for data availability queries ([toskini@who.int](mailto:toskini@who.int)).  
29  
30  
31  
32

33 **Competing interests statement:** The POCT manufacturers disclose and furnish free of charge to WHO the  
34  
35 information and sufficient quantities of the product(s) in order to enable this evaluation as part of the  
36  
37 WHO/RHR STI POC initiative. WHO is entitled to evaluate and publish the trial results, and to exclusively  
38  
39 control this evaluation and the content of the aforesaid publication. WHO shall submit any proposed  
40  
41 publication to the manufacturers for review, comments received will be considered in good faith, but the  
42  
43 decision to publish rests with WHO.  
44  
45  
46  
47

48 **Disclaimer:** Some of the authors are staff members of the World Health Organization. The authors alone are  
49  
50 responsible for the views expressed in this publication and they do not necessarily represent the views,  
51  
52 decisions or policies of the World Health Organization.  
53  
54  
55

56 **Word Count:** 3983  
57  
58  
59  
60

**FIGURES**

**Figure 1.** Bioline POCT

**Figure 2.** Chembio POCT kit

**Figure 3.** Chembio DPP Micro Reader

**Figure 4.** Patient flowchart for a clinic-based evaluation of two dual HIV/syphilis POCTs

For peer review only

**REFERENCES**

1. Dunseth CD, Ford BA, Krasowski MD. Traditional versus reverse syphilis algorithms: A comparison at a large academic medical center. *Pract Lab Med.* 2017;8:52-9 DOI: 10.1016/j.plabm.2017.04.007.
2. Cristillo AD, Bristow CC, Peeling R, et al. Point-of-care sexually transmitted infection diagnostics: Proceedings of the STAR sexually transmitted infection—clinical trial group programmatic meeting. *Sex Transm Dis.* 2017;44(4):211 DOI: 10.1097/OLQ.0000000000000572.
3. Toskin I, Govender V, Blondeel K, et al. Call to action for health systems integration of point-of-care testing to mitigate the transmission and burden of sexually transmitted infections. *Sex Transm Infect.* 2020;96:342-7 DOI: 10.1136/sextrans-2019-054358.
4. World Health Organization. WHO information note on the use of dual HIV/Syphilis rapid diagnostic tests (RDT). Geneva: World Health Organization; 2017. <https://www.who.int/reproductivehealth/publications/rtis/dual-hiv-syphilis-diagnostic-tests/en/>
5. Fleming E, Oremo J, O'Connor K, et al. The impact of integration of rapid syphilis testing during routine antenatal services in rural Kenya. *J Sex Transm Dis.* 2013;2013 DOI: 10.1155/2013/674584.
6. Dinh T-H, Kamb ML, Msimang V, et al. Integration of preventing mother-to-child transmission of HIV and syphilis testing and treatment in antenatal care services in the Northern Cape and Gauteng provinces, South Africa. *Sex Transm Dis.* 2013;40(11):846 DOI: 10.1097/OLQ.0000000000000042
7. Toskin I, Blondeel K, Peeling RW, et al. Advancing point of care diagnostics for the control and prevention of STIs: the way forward. *Sex Trans Infect.* 2017;93(S4):S81-S8 DOI: 10.1136/sextrans-2016-053073.
8. Van Den Heuvel A, Smet H, Prat I, et al. Laboratory evaluation of four HIV/syphilis rapid diagnostic tests. *BMC Infect Dis.* 2019;19(1):1 DOI: 10.1186/s12879-018-3567-x.
9. Bristow CC, Adu-Sarkodie Y, Ondondo RO, et al. Multisite laboratory evaluation of a dual human immunodeficiency virus (HIV)/syphilis point-of-care rapid test for simultaneous detection of HIV and syphilis infection. *Open Forum Infect Dis.* 2014;1(1):ofu015 DOI: 10.1093/ofid/ofu015.



10. Bristow CC, Leon SR, Huang E, et al. Field evaluation of a dual rapid diagnostic test for HIV infection and syphilis in Lima, Peru. *Sex Trans Infect.* 2016;92(3):182-5 DOI: 10.1136/sextrans-2015-052326.
11. Zorzi A, Cordioli M, Gios L, et al. Field evaluation of two point-of-care tests for syphilis among men who have sex with men, Verona, Italy. *Sex Trans Infect.* 2017;93(S4):S51-S8 DOI: 10.1136/sextrans-2016-053065.
12. Jacobsson S, Boiko I, Golparian D, et al. WHO laboratory validation of Xpert® CT/NG and Xpert® TV on the GeneXpert system verifies high performances. *Apmis.* 2018;126(12):907-12 DOI: 10.1111/apm.12902.
13. World Health Organization. Consolidated guidelines on the use of antiretroviral drugs for treating and preventing HIV infection: Recommendations for a public health approach – Second Edition. Geneva: World Health Organization; 2016. <https://www.who.int/hiv/pub/arv/arv-2016/en/>
14. European Centre for Disease Prevention and Control. HIV infection and AIDS. In: ECDC. Annual epidemiological report for 2017. Stockholm: European Centre for Disease Prevention and Control; 2019. <https://www.ecdc.europa.eu/en/publications-data/hiv-infection-and-aids-annual-epidemiological-report-2017>
15. Centers for Disease Control and Prevention. Sexually Transmitted Disease Surveillance 2018.: Centers for Disease Control and Prevention; 2019. <https://www.cdc.gov/std/stats18/default.htm>
16. World Health Organization. Global guidance on criteria and processes for validation: elimination of mother-to-child transmission of HIV and syphilis. Geneva: World Health Organization; 2014. <http://apps.who.int/iris/handle/10665/112858>
17. Whiting PF, Rutjes AW, Westwood ME, et al. QUADAS-2: a revised tool for the quality assessment of diagnostic accuracy studies. *Ann Intern Med.* 2011;155(8):529-36 DOI: 10.7326/0003-4819-155-8-201110180-00009.
18. World Health Organization. Prequalification of In Vitro Diagnostics Programme, Public Report. Geneva: World Health Organization; 2017. [https://www.who.int/diagnostics\\_laboratory/evaluations/151028\\_final\\_report\\_0179-012-00\\_sd\\_bioline\\_hiv\\_syphilis2.pdf?ua=1](https://www.who.int/diagnostics_laboratory/evaluations/151028_final_report_0179-012-00_sd_bioline_hiv_syphilis2.pdf?ua=1)
19. Banoo S, Bell D, Bossuyt P, et al. Evaluation of diagnostic tests for infectious diseases: general principles. *Nat Rev Microbiol.* 2006;4(12):S20-S32 DOI: 10.1038/nrmicro1523.

- 1 20. Peeling RW, Holmes KK, Mabey D, et al. Rapid tests for sexually transmitted infections (STIs): the  
2 way forward. Sex Trans Infect. 2006;82(suppl 5):v1-v6 DOI: 10.1136/sti.2006.024265.  
3  
4  
5 21. Land KJ, Boeras DI, Chen X-S, et al. REASSURED diagnostics to inform disease control strategies,  
6 strengthen health systems and improve patient outcomes. Nat Microbio. 2019;4(1):46-54 DOI:  
7  
8  
9 10.1038/s41564-018-0295-3.  
10  
11  
12  
13  
14  
15  
16  
17  
18  
19  
20  
21  
22  
23  
24  
25  
26  
27  
28  
29  
30  
31  
32  
33  
34  
35  
36  
37  
38  
39  
40  
41  
42  
43  
44  
45  
46  
47  
48  
49  
50  
51  
52  
53  
54  
55  
56  
57  
58  
59  
60

For peer review only

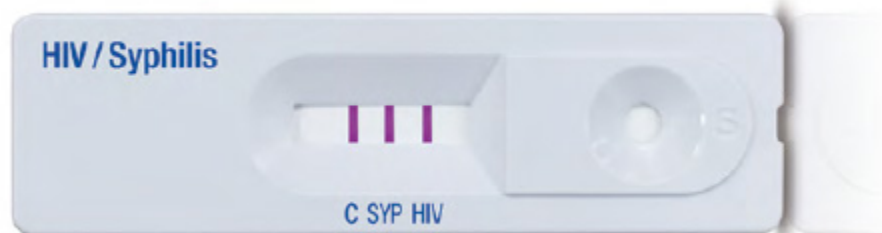

Figure 1. Bioline POCT

39x14mm (300 x 300 DPI)

1  
2  
3  
4  
5  
6  
7  
8  
9  
10  
11  
12  
13  
14  
15  
16  
17  
18  
19  
20  
21  
22  
23  
24  
25  
26  
27  
28  
29  
30  
31  
32  
33  
34  
35  
36  
37  
38  
39  
40  
41  
42  
43  
44  
45  
46  
47  
48  
49  
50  
51  
52  
53  
54  
55  
56  
57  
58  
59  
60

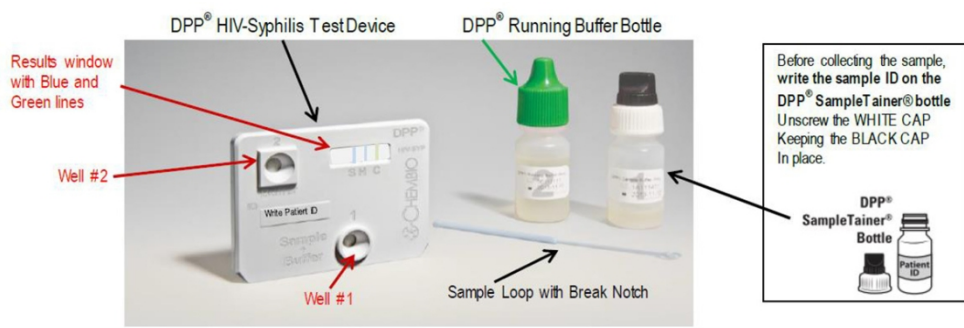

Figure 2. Chembio POCT kit  
104x34mm (300 x 300 DPI)

1  
2  
3  
4  
5  
6  
7  
8  
9  
10  
11  
12  
13  
14  
15  
16  
17  
18  
19  
20  
21  
22  
23  
24  
25  
26  
27  
28  
29  
30  
31  
32  
33  
34  
35  
36  
37  
38  
39  
40  
41  
42  
43  
44  
45  
46  
47  
48  
49  
50  
51  
52  
53  
54  
55  
56  
57  
58  
59  
60

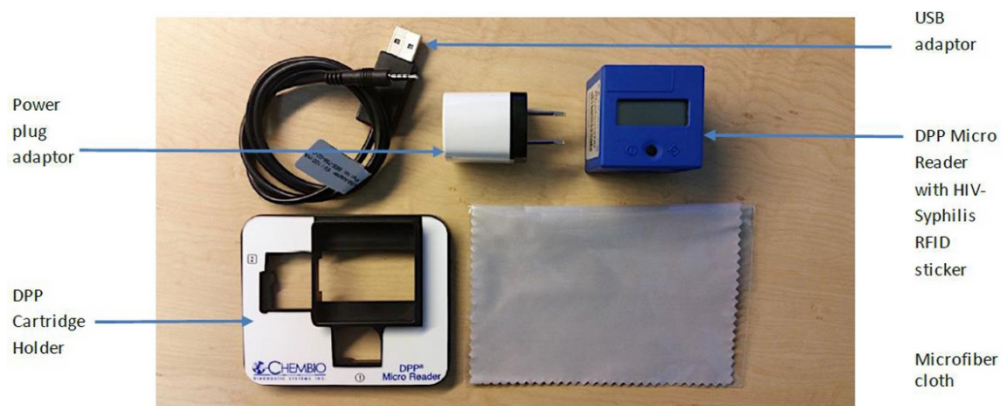

Figure 3. Chembio DPP Micro Reader

99x40mm (300 x 300 DPI)

1  
2  
3  
4  
5  
6  
7  
8  
9  
10  
11  
12  
13  
14  
15  
16  
17  
18  
19  
20  
21  
22  
23  
24  
25  
26  
27  
28  
29  
30  
31  
32  
33  
34  
35  
36  
37  
38  
39  
40  
41  
42  
43  
44  
45  
46  
47  
48  
49  
50  
51  
52  
53  
54  
55  
56  
57  
58  
59  
60

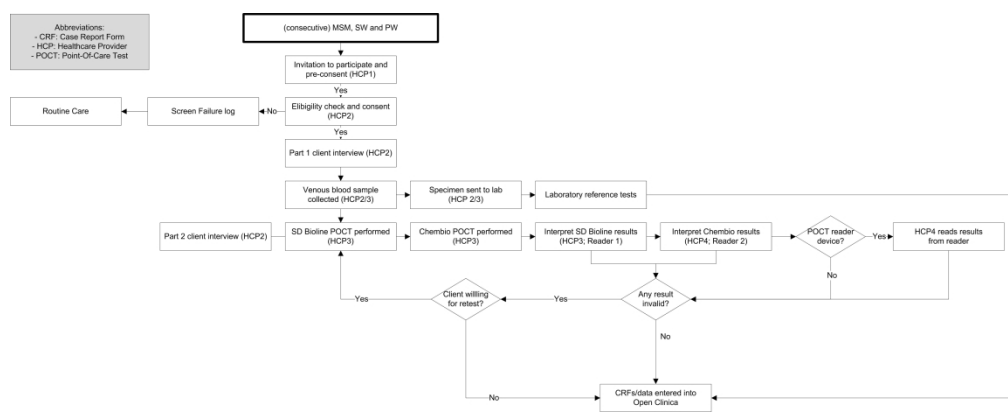

Figure 4. Patient flowchart for a clinic-based evaluation of two dual HIV/syphilis POCTs  
360x143mm (300 x 300 DPI)

### Supplementary File: Ethics committee approvals.

This master protocol was independently peer reviewed and approved by the Research Project Review Panel (RP2; A65909\_1; 11<sup>th</sup> April 2016) of the WHO Department of Sexual and Reproductive Health

It has also been adapted to individual countries and approved by RP2, ERC, and institutional review boards at each site (see supplementary file). Details of local site approvals are as follows:

| Country      | Name of review board                                                                             | Approval ID                        |
|--------------|--------------------------------------------------------------------------------------------------|------------------------------------|
| UK           | London - South East Research Ethics Committee                                                    | IRAS ID: 244187<br>REC: 18/LO/1058 |
|              | HRA and Health and Care Research Wales (HCRW)                                                    | IRAS ID: 244187                    |
|              | External Research Ethics Committee Review Panel (ERRP)                                           | ERRP-18-0194                       |
| Italy        | Comitato Etico per la sperimentazione clinica delle provincie di Verona e Rovigo                 | 1309CESC                           |
| Malta        | Faculty of Medicine and Surgery Research Ethic Committee (FREC)                                  | FRECMDS_1718_36                    |
| Peru         | Comite Institucional de Etica en Investigacion (CIEI) de la Universidad Peruana Cayetano Heredia | 101812                             |
| Uganda       | Mildmay Research Ethics committee (MUREC)                                                        | REC REF 0610-2019                  |
| Morocco      | Comite D' Ethique Pour La Recherche Biomedical                                                   | Dossier No. 94/19                  |
| South Africa | Human Research Ethics Committee (Medical), University of the Witwatersrand, Johannesburg         | Clearance Certificate No. M171058  |
