# Supplementary material for: Standardised protocol for a prospective cross-sectional multicentre clinic-based evaluation of two dual point-of-care tests for the screening of HIV and syphilis in men who have sex with men, sex workers and pregnant women
Source: PubMed Central journal article supplement — BMJ Open. 2020 Nov 26;10(11):e044479. doi: 10.1136/bmjopen-2020-044479 (PMC7692839; doi:10.1136/bmjopen-2020-044479), 2020-11-26
Supplement: bmjopen-2020-044479.reviewer_comments.pdf [file bmjopen-2020-044479.reviewer_comments.pdf]

## PEER REVIEW HISTORY

BMJ Open publishes all reviews undertaken for accepted manuscripts. Reviewers are asked to complete a checklist review form (<http://bmjopen.bmj.com/site/about/resources/checklist.pdf>) and are provided with free text boxes to elaborate on their assessment. These free text comments are reproduced below.

## ARTICLE DETAILS

|                            |                                                                                                                                                                                                                                    |
|----------------------------|------------------------------------------------------------------------------------------------------------------------------------------------------------------------------------------------------------------------------------|
| <b>TITLE (PROVISIONAL)</b> | A standardised protocol for a prospective cross-sectional multi-centre clinic-based evaluation of two dual point-of-care tests for the screening of HIV and syphilis in men who have sex with men, sex workers, and pregnant women |
| <b>AUTHORS</b>             | Sherriff, Nigel                                                                                                                                                                                                                    |

This article was not externally reviewed at BMJ Open. Protocols that have been independently assessed prior to submission to BMJ Open are usually fast-tracked to publication on the grounds that further substantial changes will not be possible. This independent assessment will usually be external, independent review for both a substantial grant award from a non-commercial or government funder and ethics approval.
